# Supplementary material for: Ancient genetic divergence in bumblebee catfish of the genus Pseudopimelodus (Pseudopimelodidae: Siluriformes) from northwestern South America
Source: PeerJ. 2020 May 29;8:e9028. doi: 10.7717/peerj.9028 (PMC7265895; doi:10.7717/peerj.9028)
Supplement: Table S2 — Asterisks indicate samples used for phylogenetic analyses. Vouchers are indicated in parentheses. CP-UCO: Colección de peces de la Universidad Católica de Oriente, Rionegro, Antioquia; IMCN: Colecciones biológicas de referencia científica del Instituto para la Investigación y Preservación del Patrimonio Cultural y Natural del Valle del Cauca –Inciva, Cali, Valle del Cauca. [file peerj-08-9028-s002.xlsx]

## Sheet: Hoja1
Species	Lab ID	Haplotype	Lineage	GenBank	River	Department (Site)	Geographic coordinates
Pseudopimelodus schultzi	CS171	H2	1	MH800577	Cauca River lower sector	Antioquia (Caucasia)	7°59'15.76527" N	75°11'43.23912" W
Pseudopimelodus schultzi (CP-UCO 3859)	RA170	H2	1	MH800576	Cauca River lower sector	Bolívar (La Raya flood plain, Montecristo)	8°20'23.80"N	74°32'17.66"W
Pseudopimelodus schultzi	PC150	H1*	1	MH595749	Cauca River lower sector	Punta Cartagena (Bolívar)	8°53'42.66892" N	74°28'45.79643" W
Pseudopimelodus schultzi	SJ168	H1	1	MH800587	Cauca River lower sector	Bolívar (San Jacinto del Cauca)	8°14'51.67"N	74°43'18.24"W
Pseudopimelodus schultzi	SJ167	H2*	1	MH595750	Cauca River lower sector	Bolívar (San Jacinto del Cauca)	8°15'4.86729" N	74°43'36.81253" W
Pseudopimelodus schultzi	ET067	H2	1	MH800569	Cauca River middle sector	Antioquia (Espíritu Santo River)	7°15'7.02"N	75°26'18.73"W
Pseudopimelodus schultzi	MG235	H3*	1	MH595751	Magdalena River lower sector	Magdalena (Magangué)	9°13'51.15497" N	74°44'43.02321" W
Pseudopimelodus schultzi	MG231	H3	1	MH800570	Magdalena River lower sector	Magdalena (Magangué)	9°13'51.15497" N	74°44'43.02321" W
Pseudopimelodus schultzi	MG234	H2	1	MH800573	Magdalena River lower sector	Magdalena (Magangué)	9°13'51.15497" N	74°44'43.02321" W
Pseudopimelodus schultzi	MG230	H2	1	MH800574	Magdalena River lower sector	Magdalena (Magangué)	9°13'51.15497" N	74°44'43.02321" W
Pseudopimelodus schultzi	MG227	H2	1	MH800578	Magdalena River lower sector	Magdalena (Magangué)	9°13'51.15497" N	74°44'43.02321" W
Pseudopimelodus schultzi	MG236	H2	1	MH800579	Magdalena River lower sector	Magdalena (Magangué)	9°13'51.15497" N	74°44'43.02321" W
Pseudopimelodus schultzi	MG238	H1	1	MH800584	Magdalena River lower sector	Magdalena (Magangué)	9°13'51.15497" N	74°44'43.02321" W
Pseudopimelodus schultzi	MG232	H1	1	MH800585	Magdalena River lower sector	Magdalena (Magangué)	9°13'51.15497" N	74°44'43.02321" W
Pseudopimelodus schultzi	MG225	H1	1	MH800588	Magdalena River lower sector	Magdalena (Magangué)	9°13'51.15497" N	74°44'43.02321" W
Pseudopimelodus schultzi	MG233	H1	1	MH800589	Magdalena River lower sector	Magdalena (Magangué)	9°13'51.15497" N	74°44'43.02321" W
Pseudopimelodus schultzi	MG237	H1	1	MH800590	Magdalena River lower sector	Magdalena (Magangué)	9°13'51.15497" N	74°44'43.02321" W
Pseudopimelodus schultzi	MG239	H1	1	MH800591	Magdalena River lower sector	Magdalena (Magangué)	9°13'51.15497" N	74°44'43.02321" W
Pseudopimelodus schultzi	MG226	H1	1	MH800598	Magdalena River lower sector	Magdalena (Magangué)	9°13'51.15497" N	74°44'43.02321" W
Pseudopimelodus schultzi	PB258	H4*	1	MH595752	Magdalena River middle sector	Magdalena (Puerto Berrío)	6°28'44.17067" N	74°24'20.5174" W
Pseudopimelodus schultzi	PB261	H1	1	MH800567	Magdalena River middle sector	Magdalena (Puerto Berrío)	6°28'44.17067" N	74°24'20.5174" W
Pseudopimelodus schultzi	PB262	H1	1	MH800568	Magdalena River middle sector	Magdalena (Puerto Berrío)	6°28'44.17067" N	74°24'20.5174" W
Pseudopimelodus schultzi	PB252	H2	1	MH800571	Magdalena River middle sector	Magdalena (Puerto Berrío)	6°28'44.17067" N	74°24'20.5174" W
Pseudopimelodus schultzi	PB256	H2	1	MH800572	Magdalena River middle sector	Magdalena (Puerto Berrío)	6°28'44.17067" N	74°24'20.5174" W
Pseudopimelodus schultzi	PB253	H2	1	MH800580	Magdalena River middle sector	Magdalena (Puerto Berrío)	6°28'44.17067" N	74°24'20.5174" W
Pseudopimelodus schultzi	PB254	H2	1	MH800581	Magdalena River middle sector	Magdalena (Puerto Berrío)	6°28'44.17067" N	74°24'20.5174" W
Pseudopimelodus schultzi	PB255	H2	1	MH800582	Magdalena River middle sector	Magdalena (Puerto Berrío)	6°28'44.17067" N	74°24'20.5174" W
Pseudopimelodus schultzi	PB259	H2	1	MH800583	Magdalena River middle sector	Magdalena (Puerto Berrío)	6°28'44.17067" N	74°24'20.5174" W
Pseudopimelodus schultzi	PB249	H1	1	MH800593	Magdalena River middle sector	Magdalena (Puerto Berrío)	6°28'44.17067" N	74°24'20.5174" W
Pseudopimelodus schultzi	PB250	H1	1	MH800594	Magdalena River middle sector	Magdalena (Puerto Berrío)	6°28'44.17067" N	74°24'20.5174" W
Pseudopimelodus schultzi	PB251	H1	1	MH800595	Magdalena River middle sector	Magdalena (Puerto Berrío)	6°28'44.17067" N	74°24'20.5174" W
Pseudopimelodus schultzi	PB257	H1	1	MH800596	Magdalena River middle sector	Magdalena (Puerto Berrío)	6°28'44.17067" N	74°24'20.5174" W
Pseudopimelodus schultzi	PB260	H1	1	MH800597	Magdalena River middle sector	Magdalena (Puerto Berrío)	6°28'44.17067" N	74°24'20.5174" W
Pseudopimelodus schultzi (IMCN 8237)	SM091	H20*	1	MH595768	San Jorge River	San Marcos (Sucre)	8°38'57.95577" N	75°6'12.66995" W
Pseudopimelodus schultzi	SM161	H2	1	MH800575	San Jorge River	Sucre (San Marcos)	8°38'57.95577" N	75°6'12.66995" W
Pseudopimelodus schultzi	SM160	H1	1	MH800586	San Jorge River	Sucre (San Marcos)	8°38'57.95577" N	75°6'12.66995" W
Pseudopimelodus schultzi	SM242	H1	1	MH800592	San Jorge River	Sucre (San Marcos)	8°38'57.95577" N	75°6'12.66995" W
Pseudopimelodus schultzi (IMCN 8237)	SM090	H1	1	MH800613	San Jorge River	Sucre (San Marcos)	8°38'57.95577" N	75°6'12.66995" W
Pseudopimelodus bufonius (IMCN 8913)	AOL008	H24*	2	MH595772	Orteguaza River	Caquetá (Florencia)	1°36'26.29963" N	75°36'38.3591" W
Pseudopimelodus bufonius (IMCN 8913)	AOL068	H26	2	MH800611	Orteguaza River	Caquetá (Florencia)	1°36'26.29963" N	75°36'38.3591" W
Pseudopimelodus bufonius (IMCN 8913)	AOL089	H26	2	MH800612	Orteguaza River	Caquetá (Florencia)	1°36'26.29963" N	75°36'38.3591" W
Pseudopimelodus bufonius (IMCN 8913)	AOL011	H26	2	MH800614	Orteguaza River	Caquetá (Florencia)	1°36'26.29963" N	75°36'38.3591" W
Pseudopimelodus bufonius (IMCN 8913)	AOL010	H26	2	MH800615	Orteguaza River	Caquetá (Florencia)	1°36'26.29963" N	75°36'38.3591" W
Pseudopimelodus bufonius (IMCN 8913)	AOL009	H26	2	MH800616	Orteguaza River	Caquetá (Florencia)	1°36'26.29963" N	75°36'38.3591" W
Pseudopimelodus bufonius (IMCN 8230)	AOL088	H26*	2	MH595774	Vaupés River	Vaupés (Mitú)	1°15'40.0709" N	70°14'30.35315" W
Pseudopimelodus bufonius (IMCN 8919)	AOL016	H21*	3	MH595769	Orinoco River	Meta (Puerto López)	4°5'23.21277" N	72°57'24.05246" W
Pseudopimelodus bufonius (IMCN 8919)	AOL015	H22*	3	MH595770	Orinoco River	Meta (Puerto López)	4°5'23.21277" N	72°57'24.05246" W
Pseudopimelodus bufonius (IMCN 8919)	AOL014	H23*	3	MH595771	Orinoco River	Meta (Puerto López)	4°5'23.21277" N	72°57'24.05246" W
Pseudopimelodus bufonius (IMCN 8917)	AOL092	H25*	3	MH595773	Orinoco River	Meta (near Villavicencio)	4°2'40.29681" N	73°10'36.35562" W
Pseudopimelodus schultzi	AT224	H14*	4	MH595762	Atrato River	Chocó (Quibdó)	5°42'0.23416" N	76°40'1.83441" W
Pseudopimelodus schultzi	AT218	H13	4	MH800601	Atrato River	Chocó (Quibdó)	5°42'0.23416" N	76°40'1.83441" W
Pseudopimelodus schultzi	AT215	H13	4	MH800603	Atrato River	Chocó (Quibdó)	5°42'0.23416" N	76°40'1.83441" W
Pseudopimelodus schultzi	AT216	H13	4	MH800604	Atrato River	Chocó (Quibdó)	5°42'0.23416" N	76°40'1.83441" W
Pseudopimelodus schultzi	AT220	H13	4	MH800605	Atrato River	Chocó (Quibdó)	5°42'0.23416" N	76°40'1.83441" W
Pseudopimelodus schultzi	AT221	H13	4	MH800606	Atrato River	Chocó (Quibdó)	5°42'0.23416" N	76°40'1.83441" W
Pseudopimelodus schultzi	AT222	H13	4	MH800607	Atrato River	Chocó (Quibdó)	5°42'0.23416" N	76°40'1.83441" W
Pseudopimelodus schultzi	AT223	H13	4	MH800608	Atrato River	Chocó (Quibdó)	5°42'0.23416" N	76°40'1.83441" W
Pseudopimelodus schultzi	AT219	H9*	4	MH595757	Atrato River	Chocó (Quibdó)	5°42'0.23416" N	76°40'1.83441" W
Pseudopimelodus schultzi (IMCN 8241)	AOL001	H11*	4	MH595759	Sinú River	Córdoba (Urrá dam)	7°56'33.85324" N	76°17'36.0764" W
Pseudopimelodus schultzi (IMCN 8241)	AOL003	H6*	4	MH595754	Sinú River	Córdoba (Urrá dam)	7°56'33.85324" N	76°17'36.0764" W
Pseudopimelodus schultzi (IMCN 8241)	AOL004	H7*	4	MH595755	Sinú River	Córdoba (Urrá dam)	7°56'33.85324" N	76°17'36.0764" W
Pseudopimelodus schultzi (IMCN 8241)	AOL002	H9	4	MH800617	Sinú River	Córdoba (Urrá dam)	7°56'33.85324" N	76°17'36.0764" W
Pseudopimelodus schultzi	BO008	H8*	5	MH595756	Cauca River middle sector	Antioquia (Bolombolo)	5°58'31.98727" N	75°50'32.44197" W
Pseudopimelodus schultzi	BO005	H12*	5	MH595760	Cauca River middle sector	Antioquia (Bolombolo)	5°58'31.98727" N	75°50'32.44197" W
Pseudopimelodus schultzi	BO196	H15*	5	MH595763	Cauca River middle sector	Antioquia (Bolombolo)	5°58'31.98727" N	75°50'32.44197" W
Pseudopimelodus schultzi	BO201	H17*	5	MH595765	Cauca River middle sector	Antioquia (Bolombolo)	5°58'31.98727" N	75°50'32.44197" W
Pseudopimelodus schultzi	BO199	H15	5	MH800609	Cauca River middle sector	Antioquia (Bolombolo)	5°58'31.98727" N	75°50'32.44197" W
Pseudopimelodus schultzi	BO200	H15	5	MH800610	Cauca River middle sector	Antioquia (Bolombolo)	5°58'31.98727" N	75°50'32.44197" W
Pseudopimelodus schultzi	PV162	H13*	5	MH595761	Cauca River middle sector	Antioquia (Puerto Valdivia)	7°17'31.08828" N	75°23'43.94284" W
Pseudopimelodus schultzi	SF011	H12	5	MH800600	Cauca River middle sector	Antioquia (Santa Fe)	6°33'11.25919" N	75°48'5.7875" W
Pseudopimelodus schultzi (IMCN 8939)	AOL005	H5*	5	MH595753	Cauca River upper sector	Valle del Cauca (El Hormiguero)	3°18'59.08866" N	76°28'14.40501" W
Pseudopimelodus schultzi (IMCN 8939)	AOL008	H10*	5	MH595758	Cauca River upper sector	Valle del Cauca (El Hormiguero)	3°18'59.08866" N	76°28'14.40501" W
Pseudopimelodus schultzi (IMCN 8939)	AOL007	H16*	5	MH595764	Cauca River upper sector	Valle del Cauca (El Hormiguero)	3°18'59.08866" N	76°28'14.40501" W
Pseudopimelodus schultzi (IMCN 8939)	AOL006	H19*	5	MH595767	Cauca River upper sector	Valle del Cauca (El Hormiguero)	3°18'59.08866" N	76°28'14.40501" W
Pseudopimelodus schultzi	NE244	H18*	5	MH595766	Magdalena River upper sector	Huila (Neiva)	2°56'12.60776" N	75°18'26.65305" W
Pseudopimelodus schultzi	NE243	H14	5	MH800599	Magdalena River upper sector	Huila (Neiva)	2°56'12.60776" N	75°18'26.65305" W
Pseudopimelodus schultzi	NE242	H12	5	MH800602	Magdalena River upper sector	Huila (Neiva)	2°56'12.60776" N	75°18'26.65305" W
Cruciglanis sp. (IMCN 8958)	AOL081			MH595775	Mira River	Nariño (Candelillas)	1°28'15'' N	78°41'00'' W
Cruciglanis pacifici (IMCN 8955)	AOL94			MH595776	Anchicayá River	Valle del Cauca	3°44'25" N	76°57'58" W
Microglanis sp. (IMCN 8947)	AOL095			MH595777	Acacias River	Meta (Acacias)	3°58'52'' N	73°44'47'' W
Rhyacoglanis annulatus (IMCN 8246)	AOL097			MH595778	Negro River	Meta	4°01'15" N	73°28'36" W
Rhyacoglanis annulatus (IMCN 8244)	AOL098			MH595779	Negro River	Meta	4°01'15" N	73°28'36" W
Pimelodus yuma	Py002			MH595780	Cauca River lower sector	Bolívar (Playa las Flores)	8°53'0.94966" N	74°27'51.70707" W
Pseudoplatystoma magdaleniatum	Psm008			MH595781	Cauca River lower sector	Bolívar (Playa las Flores)	8°53'0.94966" N	74°27'51.70707" W
